# Supplementary material for: Off-the-shelf CAR natural killer cells secreting IL-15 target spike in treating COVID-19
Source: PubMed Central journal article supplement (PMC9095674; doi:10.1038/s41467-022-30216-8), 2022-05-11
Supplement: 41467_2022_30216_MOESM1_ESM.pdf [file 41467_2022_30216_MOESM1_ESM.pdf]

## Supplementary Information

### Off-the-Shelf CAR Natural Killer Cells Secreting IL-15 Target Spike in Treating COVID-19

Ting Lu<sup>1,2,†</sup>, Rui Ma<sup>1,†</sup>, Wenjuan Dong<sup>1,†</sup>, Kun-Yu Teng<sup>1</sup>, Daniel S Kollath<sup>3</sup>, Zhiyao Li<sup>1</sup>, Jinhee Yi<sup>3</sup>, Christian Bustillos<sup>1</sup>, Shoubao Ma<sup>1</sup>, Lei Tian<sup>1</sup>, Anthony G. Mansour<sup>1</sup>, Zhenlong Li<sup>1</sup>, Erik W Settles<sup>3</sup>, Jianying Zhang<sup>4</sup>, Paul S Keim<sup>3,5</sup>, Bridget M. Barker<sup>3</sup>, Michael A. Caligiuri<sup>1,2,6\*</sup>, and Jianhua Yu<sup>1,2,6,7\*</sup>

<sup>1</sup>Department of Hematology and Hematopoietic Cell Transplantation, City of Hope National Medical Center, Los Angeles, CA 91010, USA.

<sup>2</sup>Hematologic Malignancies Research Institute, City of Hope National Medical Center, Los Angeles, CA 91010, USA.

<sup>3</sup>Pathogen and Microbiome Institute, Northern Arizona University, Flagstaff, AZ 86011, USA.

<sup>4</sup>Department of Computational and Quantitative Medicine, City of Hope National Medical Center, Los Angeles, CA 91010, USA.

<sup>5</sup>Division of Pathogen and Microbiome, TGen North; Flagstaff, AZ 86011, USA

<sup>6</sup>City of Hope Comprehensive Cancer Center, Los Angeles, CA 91010, USA.

<sup>7</sup>Department of Immuno-Oncology, Beckman Research Institute of City of Hope, Los Angeles, CA 91010, USA.

<sup>†</sup>Equally contributing authors

\*Corresponding authors. Email: Michael A. Caligiuri, MD, mcaligiuri@coh.org and Jianhua Yu, PhD, jiyayu@coh.org.

# Supplementary Fig. 1

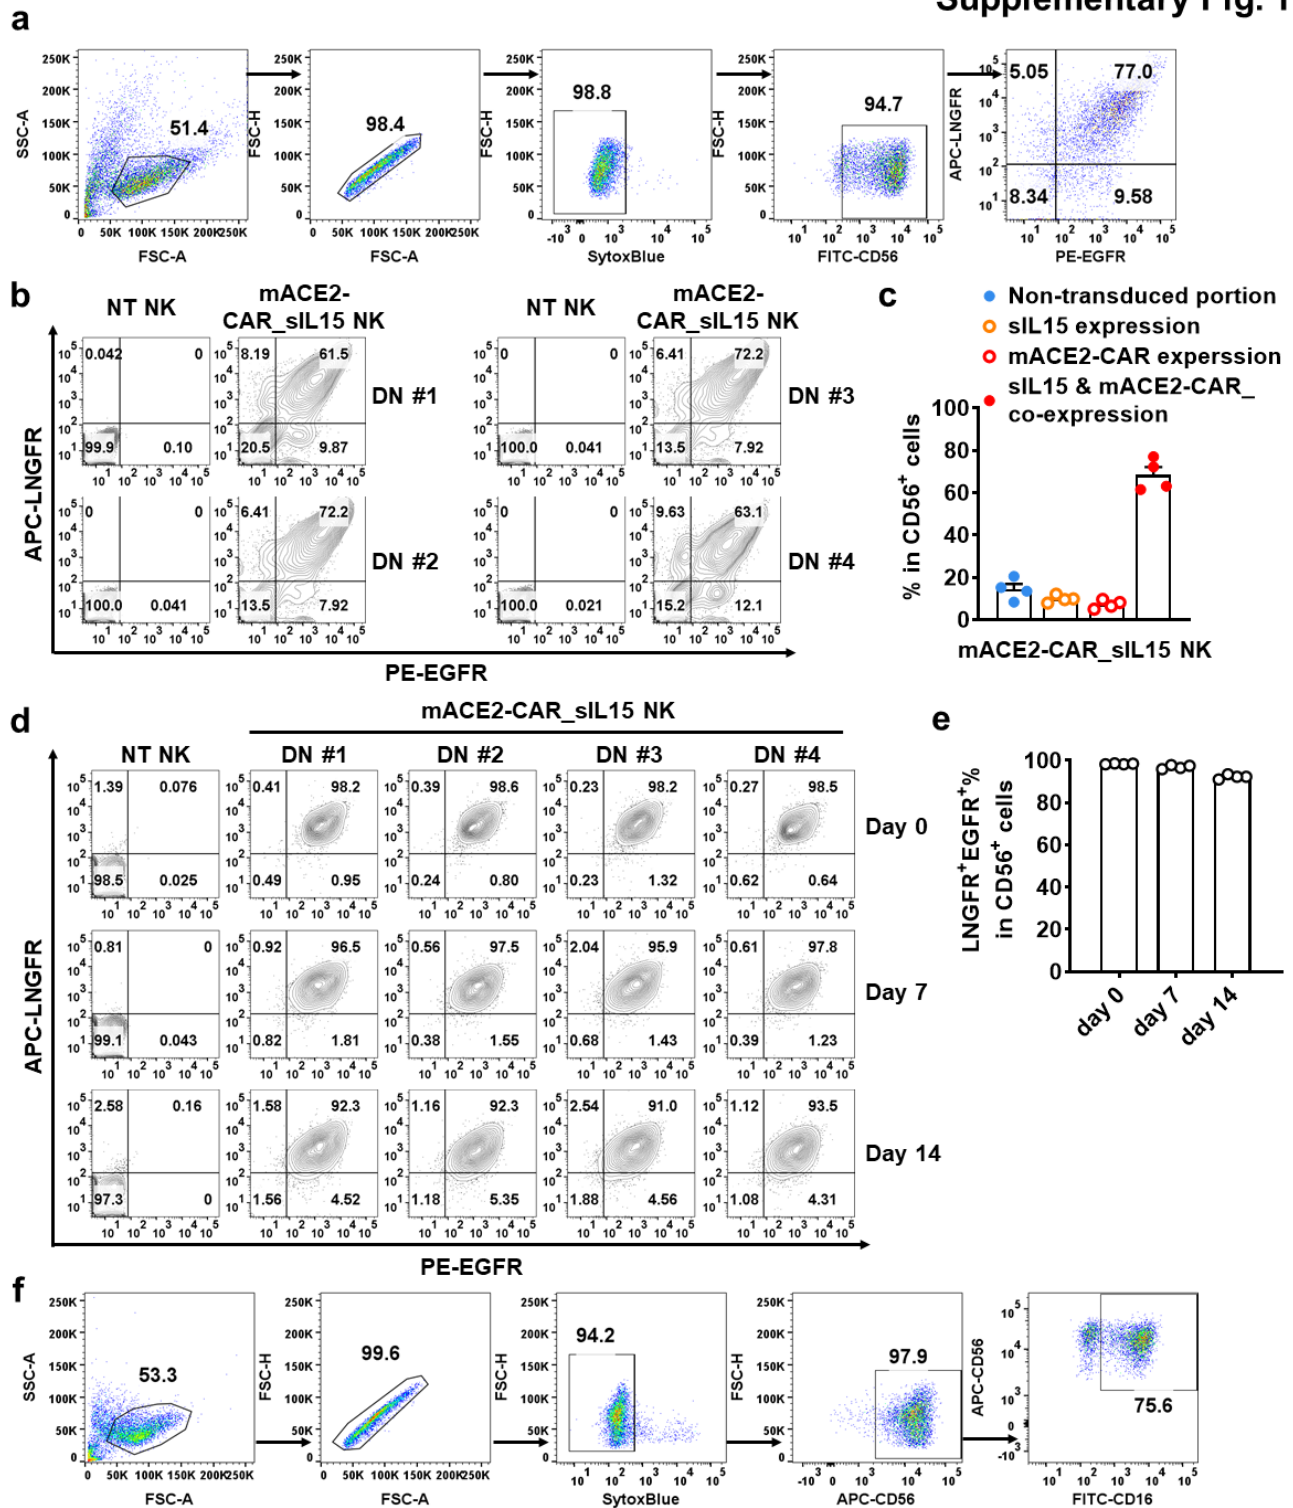

**Supplementary Figure 1. (a)** Gating strategy to determine the percentage of LNDR<sup>+</sup>EGFR<sup>+</sup> NK cells. **(b, c)** The transduction efficiency of mACE2-CAR\_sIL15 NK cells was determined by flow

cytometry, with the percentage of LNGFR representing mACE2-CAR expression and the percentage of EGFR representing sIL15 expression. Representative flow cytometry plots (**b**) and summary data (**c**) from 4 different donors are shown. (**d, e**) The mACE2-CAR and sIL15 double-positive NK cells were sorted from four different donors and then continued to be cultured for 2 weeks. Expression of mACE2-CAR and sIL15 in these cells was detected at day 7 and day 14 post culture via flow cytometry. Representative flow cytometry plots (**d**) and summary data (**e**) from 4 different donors are shown. NT, non-transduced; DN, donor. Data are presented as mean  $\pm$  SD. (**f**) Gating strategy to determine the surface markers on NK cells.

## Supplementary Fig. 2

**a**

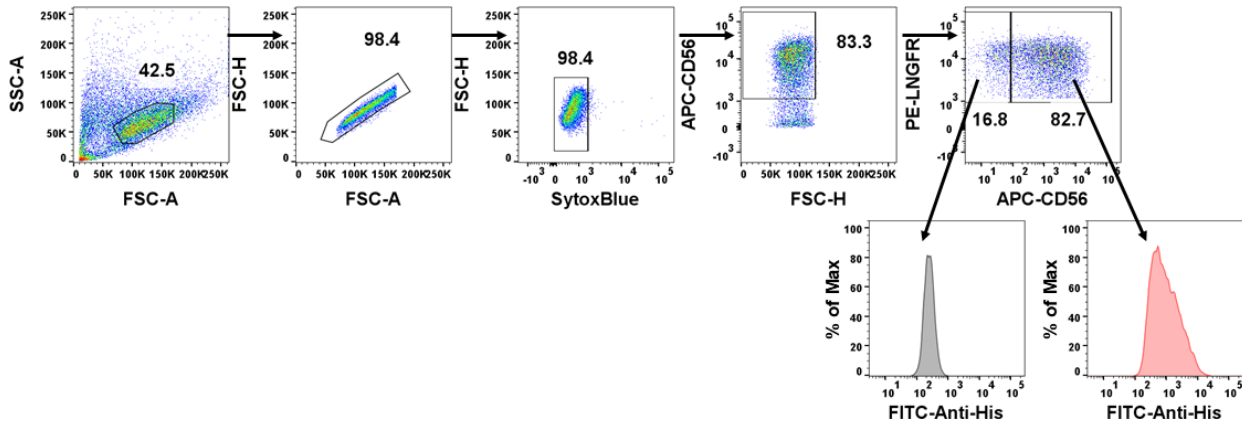

**b**

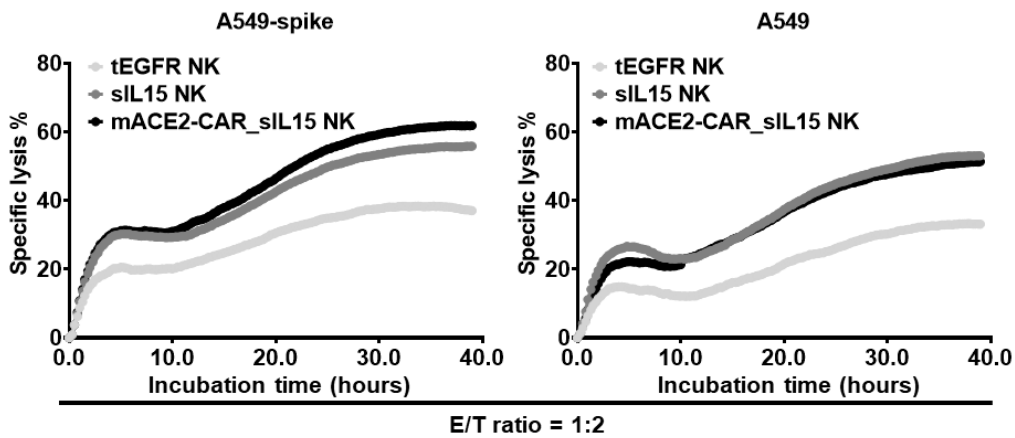

**c**

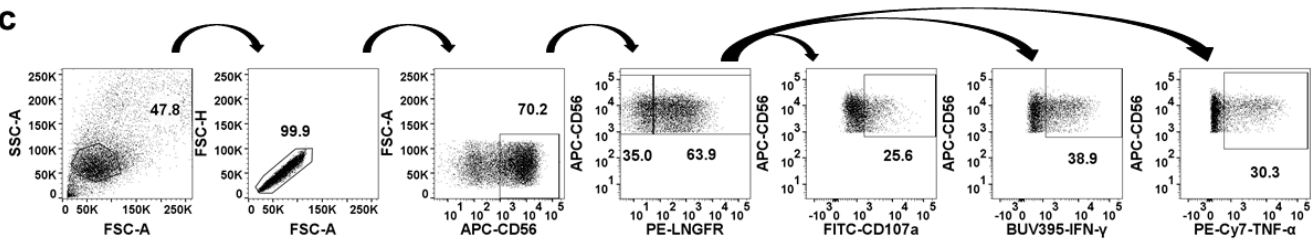

**Supplementary Figure 2. (a)** Gating strategy to determine the percentage of spike protein or VSV-SARS-CoV-2 chimeric viral particles binding in NK cells. **(b)** Representative real-time cell analysis (RTCA) assay data showing NK cell cytotoxicity against A549-spike or parental A549 cells at an effector/target (E/T) ratio of 1:2. **(c)** Representative flow cytometry plots showing general gating strategy for the percentages of CD56<sup>+</sup>CD107a<sup>+</sup>, CD56<sup>+</sup>IFN- $\gamma$ <sup>+</sup> and CD56<sup>+</sup>TNF- $\alpha$ <sup>+</sup> in transduced NK cells.

### Supplementary Fig. 3

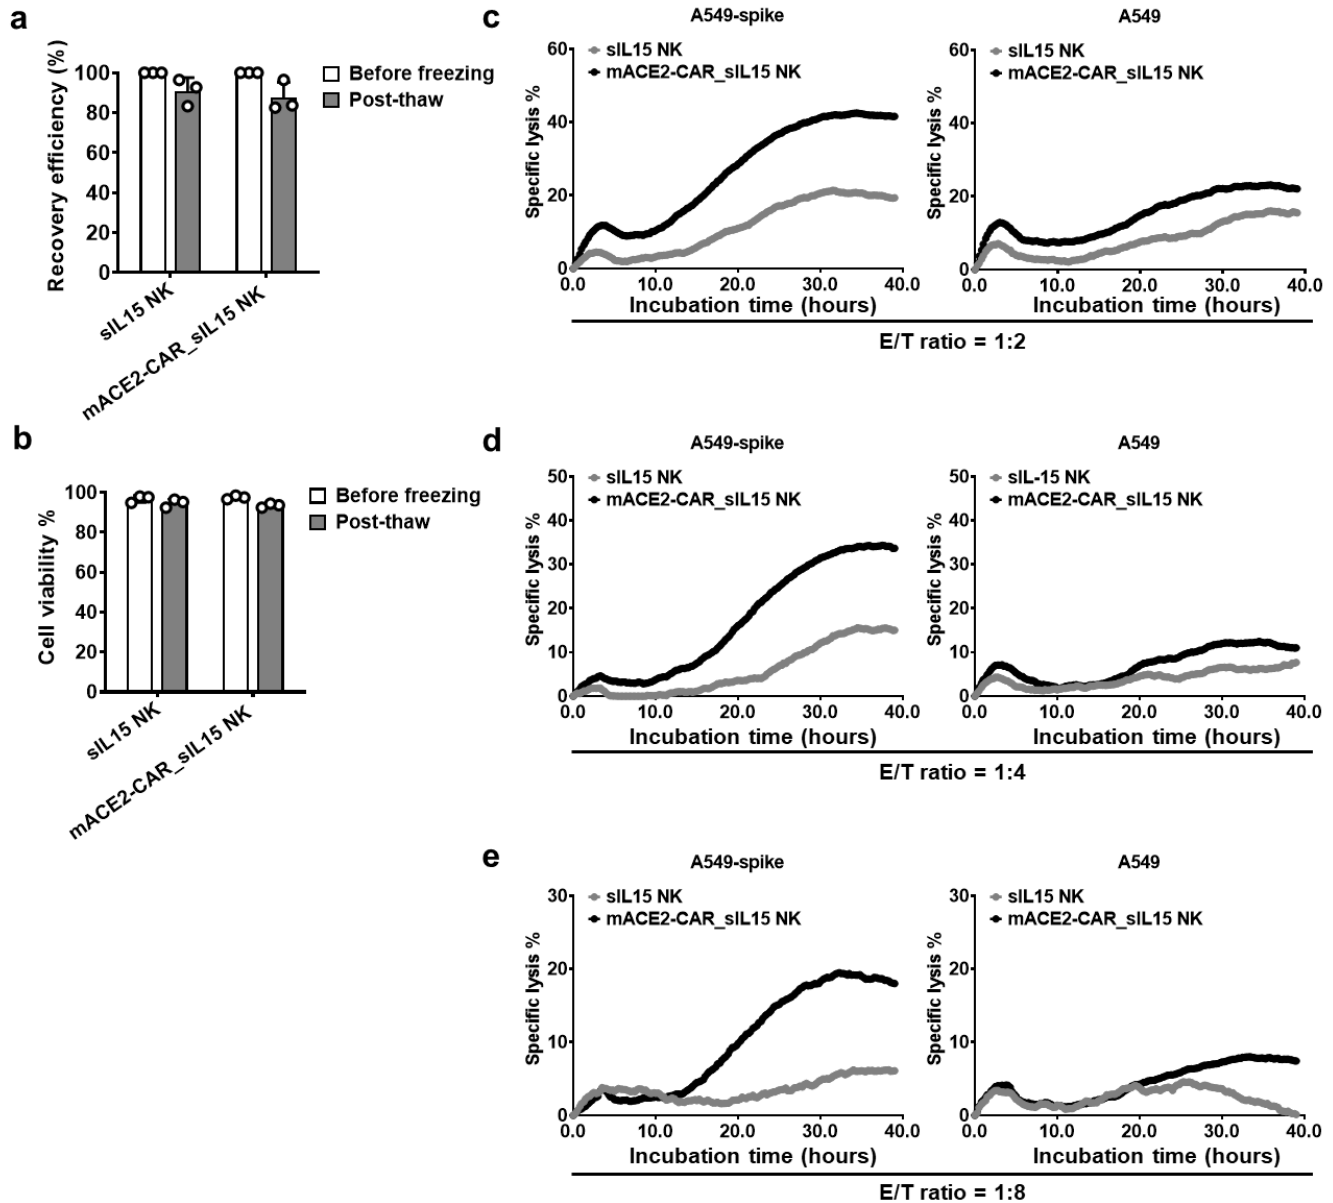

**Supplementary Figure 3.** (a) CAR expression in mACE2-CAR\_sIL15 NK cells post-thaw, as determined by flow cytometry. Data are summarized from 3 different donors. (b) Cell viability of mACE2-CAR\_sIL15 NK cells prior to freezing and post-thaw was determined using the Muse Cell Analyzer. Data are summarized from 3 different donors. (c-e) Freeze-thawed sIL15 control NK or mACE2-CAR\_sIL15 NK cells were co-cultured with A549-spike or parental A549 cells for real-time cell analysis (RTCA) assay. Representative RTCA assay data showing NK cell cytotoxicity against A549-spike or parental A549 cells at effector/ target (E/T) ratios of 1:2 (c), 1:4 (d), and 1:8 (e). Data are presented as mean  $\pm$  SD.

Supplementary Fig. 4

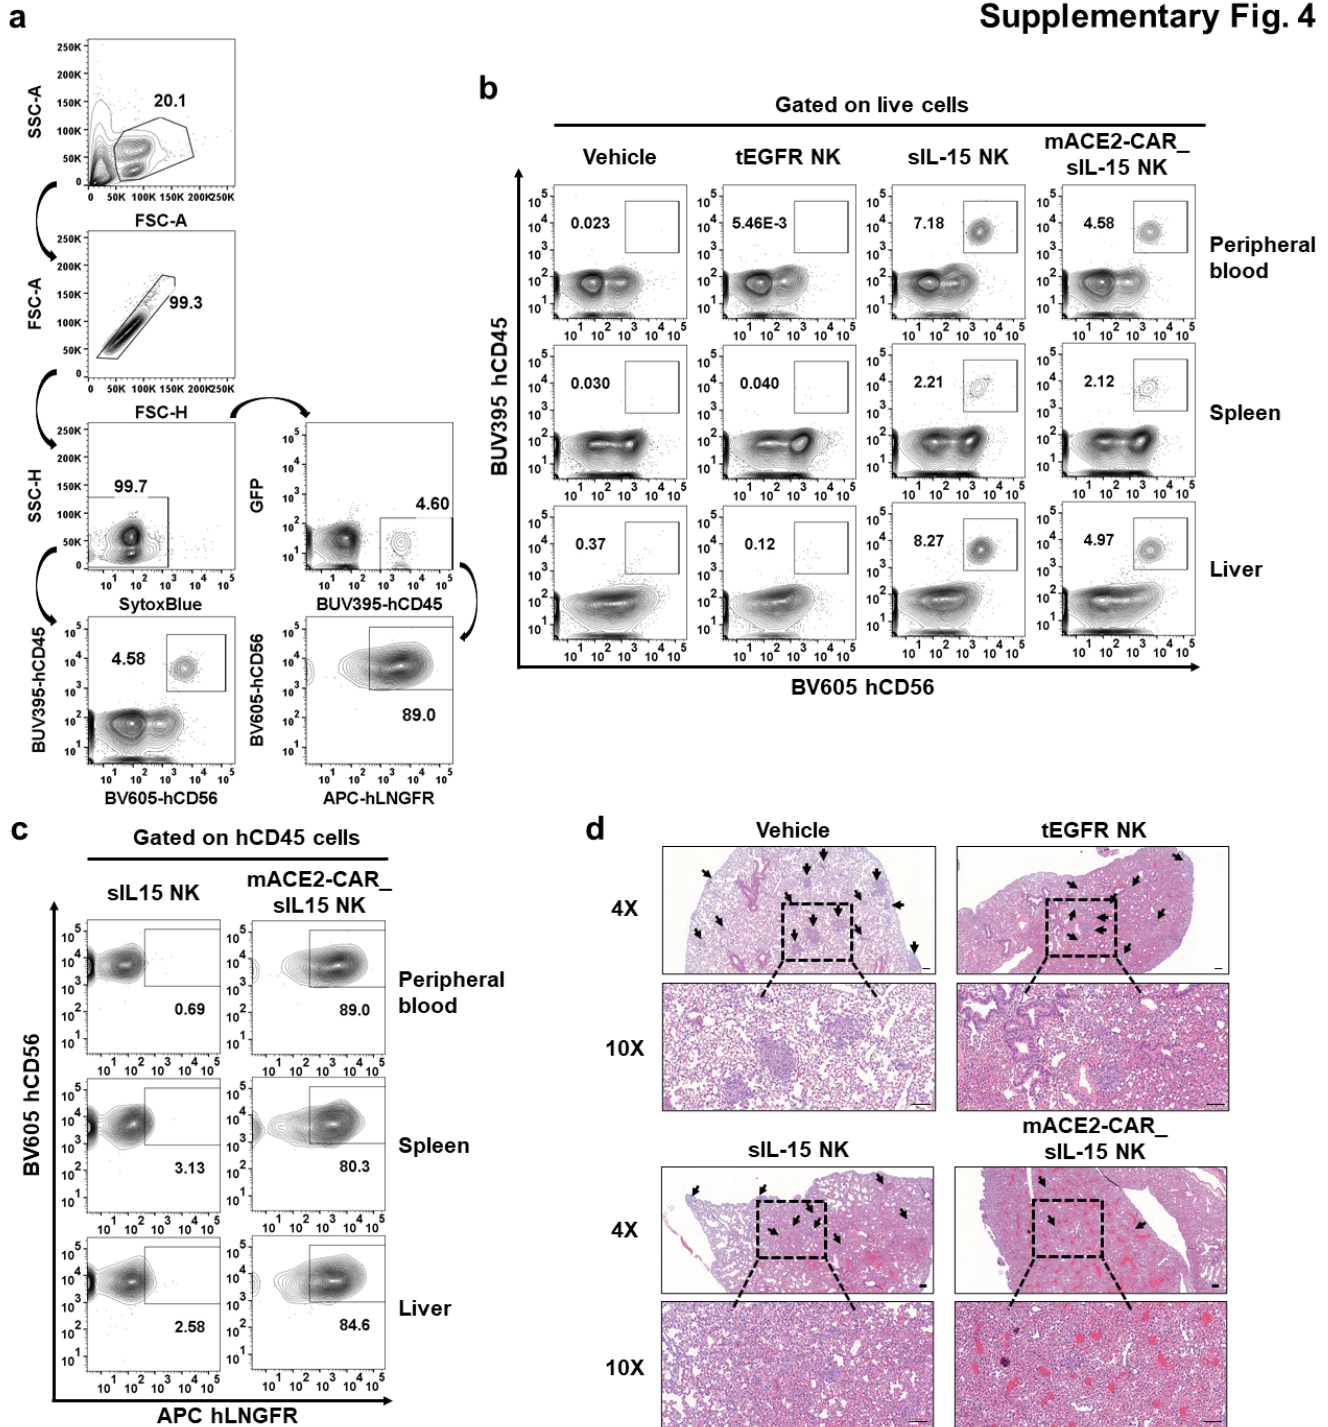

**Supplementary Figure 4. (a-c)** The A549-spike engrafted NSG mice were treated with PBS, control tEGFR, control sIL15, or mACE2-CAR\_sIL15 NK cells (4 mice/group), followed by euthanasia on day 20. Peripheral blood, spleens, and livers were harvested and analyzed for expression of human (h)CD45 (a human lymphocyte marker) by flow cytometry. Representative flow cytometry plots showing general gating strategy for **b** and **c** was shown in **(a)**, the persistence

of human NK cells (hCD45<sup>+</sup>hCD56<sup>+</sup>) was shown in **(b)**, and the expression of mACE2-CAR (hCD56<sup>+</sup>hLNGFR<sup>+</sup>) was shown in **(c)**. **(d)** Representative images of hematoxylin and eosin (H&E) staining for lung tissues of mice after the indicated treatments (4 mice/group). Back arrows indicate A549 tumor nodules. Scale bars, 100  $\mu$ m.

### Supplementary Fig. 5

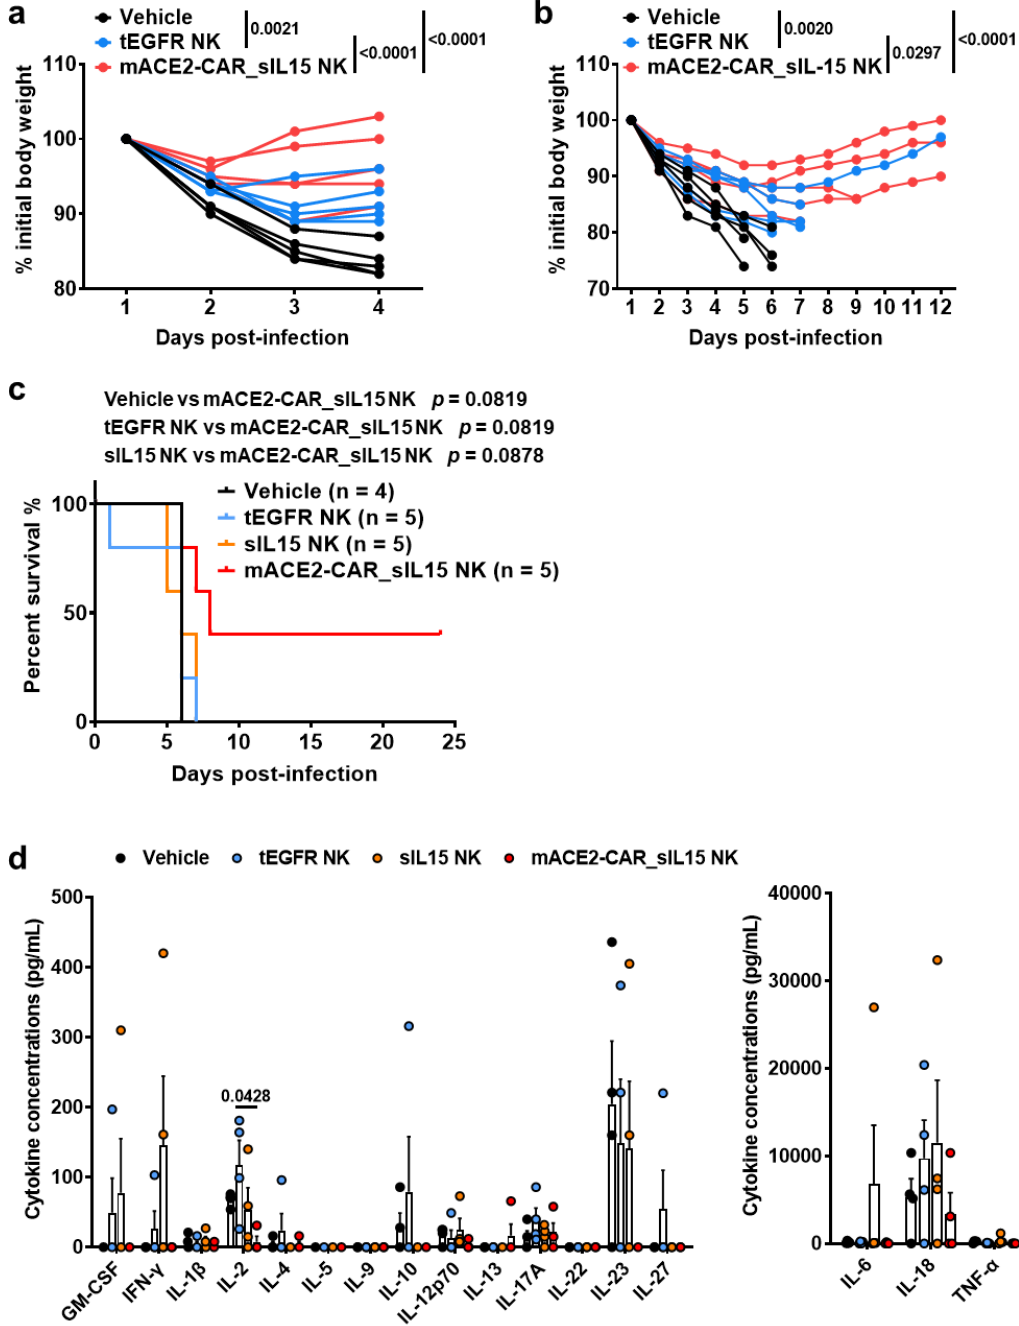

**Supplementary Figure 5.** (a) K18-hACE2 transgenic mice were infected with  $1 \times 10^2$  plaque-forming units (PFU) of SARS-CoV-2 prior to receiving the treatment with the vehicle (PBS), control tEGFR NK cells, or freeze-thawed mACE2-CAR\_sIL15 NK cells. Relative body weights were shown with 5 mice/group. *P* values were determined by two-way ANOVA with repeated measures and adjusted by the Holm-Sidak method at day 4. Data are presented as mean  $\pm$  SD. (b) K18-hACE2 humanized transgenic mice were infected with  $1 \times 10^3$  plaque-forming units (PFU)



of SARS-CoV-2 prior to treatment with the vehicle (PBS), control tEGFR NK cells, or mACE2-CAR\_sIL15 NK cells. Relative body weights were shown with 5 mice/group. *P* values were determined by two-way ANOVA with repeated measures and adjusted by the Holm-Sidak method at day 6. Data are presented as mean  $\pm$  SD. **(c)** K18-hACE2 humanized transgenic mice were infected with  $1 \times 10^3$  plaque-forming units (PFU) of SARS-CoV-2 prior to treatment with the vehicle (PBS), control tEGFR NK cells, control sIL15 NK cells, or mACE2-CAR\_sIL15 NK cells. Survival was summarized with 4 mice in the vehicle group and 5 mice in each of the other groups. *P* values were determined by Kaplan-Meier survival analysis and calculated by the Log-rank test (two-sided). **(d)** Determination of various cytokines in plasma of K18-hACE2 transgenic mice. Mice were infected with  $1 \times 10^3$  PFU of live SARS-CoV-2 prior to being treated with the vehicle (PBS), control tEGFR NK cells, control sIL15 NK cells, or mACE2-CAR\_sIL15 NK cells on the same day. Four days later, mice were sacrificed to collect blood plasma to measure levels of the indicated cytokines by a cytokine release Luminex assay in a BSL3 lab. Data are summarized from 4 different mice in each group. *P* values were determined by one-way ANOVA with multiple comparisons and adjusted by the Holm-Sidak method. Data are presented as mean  $\pm$  SD.

**Supplementary Table 1:** Information of antibodies used in flow cytometric assay.

| <b>Antibody</b>      | <b>Conjugation</b> | <b>Company</b>  | <b>Cat#</b> | <b>Dilution</b> |
|----------------------|--------------------|-----------------|-------------|-----------------|
| CD56                 | APC                | Beckman Coulter | B46024      | 1:20            |
| CD56                 | BV605              | BD Bioscience   | 562780      | 1:20            |
| CD56                 | FITC               | BD Bioscience   | 562794      | 1:20            |
| LNGFR                | APC                | BD Biosciences  | 560326      | 1:20            |
| LNGFR                | PE                 | BD Biosciences  | 557196      | 1:20            |
| CD16                 | FITC               | BD Bioscience   | 555406      | 1:10            |
| CD69                 | FITC               | BD Bioscience   | 557049      | 1:10            |
| CD62L                | FITC               | BD Bioscience   | 561914      | 1:10            |
| KIR-NKAT2            | FITC               | BD Bioscience   | 556070      | 1:10            |
| NKG2A                | FITC               | Miltenyi Biotec | 130-113-563 | 1:50            |
| NKp44                | FITC               | Miltenyi Biotec | 130-118-542 | 1:50            |
| CD94                 | FITC               | BD Biosciences  | 555888      | 1:10            |
| TRAIL                | PE                 | BD Bioscience   | 550516      | 1:50            |
| NKp46                | PE                 | BD Bioscience   | 557991      | 1:20            |
| DNAM-1               | PE                 | BD Bioscience   | 559789      | 1:10            |
| CD25                 | PE                 | BD Bioscience   | 555432      | 1:10            |
| NKG2D                | PE                 | BD Bioscience   | 557940      | 1:50            |
| CD3                  | PE                 | BD Bioscience   | 555333      | 1:20            |
| CD3                  | VioGreen           | Miltenyi Biotec | 130-113-134 | 1:50            |
| NKp30                | PE                 | BioLegend       | 325208      | 1:20            |
| EGFR                 | PE                 | BioLegend       | 352904      | 1:50            |
| CD45                 | BUV395             | BD Biosciences  | 563792      | 1:20            |
| IFN- $\gamma$        | BUV395             | BD Biosciences  | 563563      | 1:20            |
| TNF- $\alpha$        | PE-Cy7             | BD Biosciences  | 557647      | 1:20            |
| CD107a               | FITC               | BioLegend       | 328606      | 1:200           |
| Anti-His             | FITC               | ThermoFisher    | MA1-81891   | 1:20            |
| Mouse IgG1           | FITC               | BD Biosciences  | 555748      | 1:10            |
| Mouse IgG1           | PE                 | BD Biosciences  | 559320      | 1:10            |
| Mouse IgG1           | PE                 | BioLegend       | 400111      | 1:20            |
| goat anti-rabbit IgG | FITC               | BD Biosciences  | 554020      | 1:20            |
